# Supplementary material for: Enabling a process-oriented hydro-biogeochemical model to simulate soil erosion and nutrient losses
Source: Copernicus journal article supplement (doi:10.5194/bg-2022-238), 2023-02-13
Supplement: Supplementary file 1 [file bg-2022-238-supplement.zip]

Archive with 3 entries (3 files):
- Table S1.pdf
- Text S1.pdf
- Fig. S1_S2_S3_S4.pdf
