# Supplementary material for: Enabling a process-oriented hydro-biogeochemical model to simulate soil erosion and nutrient losses
Source: Copernicus journal article supplement (doi:10.5194/bg-2022-238), 2023-02-13
Supplement: Supplementary file 1 [file bg-2022-238-supplement.zip › Table S1.pdf]

Table S1 Performance of the revised CNMM-DNDC model in simulating surface runoff, sediment, and particulate and total nitrogen (N) losses at the lysimetric plot from 2004 to 2006. Total N is referred to as the total amount of  $\text{NH}_4^+$ ,  $\text{NO}_3^-$ , dissolved organic N and particulate N.

|                    | Calibration period (2005-2006) |      |       |       |         | Verification period (2004) |      |       |       |                 |
|--------------------|--------------------------------|------|-------|-------|---------|----------------------------|------|-------|-------|-----------------|
|                    | Size                           | RMSE | Slope | $R^2$ | $p$     | Size                       | RMSE | Slope | $R^2$ | $p$             |
| Surface runoff     | 9                              | 33.9 | 1.01  | 0.94  | < 0.001 | 7                          | 15.2 | 0.75  | 0.96  | < 0.001         |
| Sediment loss      | 7                              | 52.1 | 0.76  | 0.97  | < 0.001 | 7                          | 32.0 | 0.86  | 0.83  | < 0.01          |
| Particulate N loss | 9                              | 46.7 | 0.87  | 0.98  | < 0.001 | 7                          | 88.0 | 1.17  | 0.85  | < 0.01          |
| Total N loss       | 9                              | 35.4 | 0.93  | 0.98  | < 0.001 | 7                          | 69.4 | 0.87  | 0.44  | Not significant |

The statistical criteria to quantify the discrepancy between observations and simulations include the normalized root mean square error (RMSE) and the slope, determination coefficient ( $R^2$ ) and significant level ( $p$ ) of the zero-intercept univariate linear regression (ZIR). Size represents the sample size. The results were derived from Li et al. (2022).

## Reference

Li, S., Li, Y., Zhang, W., Zheng, X., Hu, P., Fan, J., Wang, T., Zhu, B., 2022. Simulation of water-induced erosion and transport of particulate elements in catchment by extending the CNMM-DNDC model. Chinese Journal of Eco-Agriculture, (Accepted).
